# Supplementary material
Source: PubMed Central journal article supplement (PMC6520106)
Supplement: NIHMS1027709-supplement-SI.pdf [file NIHMS1027709-supplement-SI.pdf]

# A Quantitative Model for BicD2/Cargo Interactions

*Crystal R Noell<sup>1,+</sup>, Kyle M Loftus<sup>1,+</sup>, Heying Cui<sup>1</sup>, Christof Grewer<sup>1</sup>, Megan Kizer<sup>1</sup>, Erik W Debler<sup>2</sup>, and Sozanne R Solmaz<sup>1,\*</sup>*

<sup>1</sup>Department of Chemistry, State University of New York at Binghamton, Binghamton, NY 13902.

<sup>2</sup>Department of Biochemistry & Molecular Biology, Thomas Jefferson University, Philadelphia, PA 19107.

## SUPPLEMENTARY INFORMATION

### SUPPLEMENTARY FIGURES

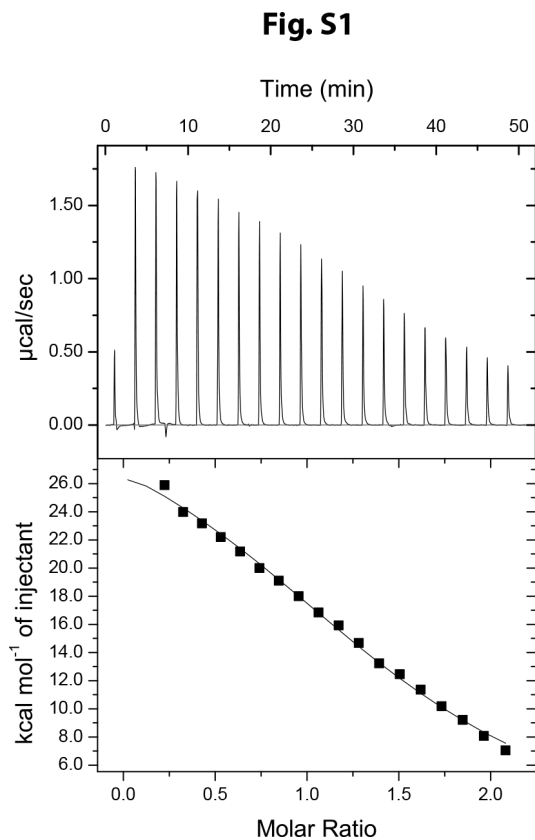

**Fig. S1** The affinity between  $\text{Rab6}^{\text{GTP}}_{\text{min}}$  and BicD2-CTD was determined by ITC to  $12 \pm 1.2 \mu\text{M}$ . The ITC titration curve of BicD2-CTD with  $\text{Rab6}^{\text{GTP}}_{\text{min}}$  is shown. It should be noted that the titration of the truncated  $\text{Rab6}^{\text{GTP}}_{\text{min}}$  into buffer was exothermic, whereas it was endothermic for the full-length protein.

## SUPPLEMENTARY TABLES

**Table S1 Protein concentrations used for ITC experiments**

|                                   |             |           |             |
|-----------------------------------|-------------|-----------|-------------|
| Nup358-RBD2                       | 88 $\mu$ M  | BicD2-CTD | 8.8 $\mu$ M |
| Nup358-RBD2/RanGTP                | 150 $\mu$ M | BicD2-CTD | 15 $\mu$ M  |
| Rab6 <sup>GTP</sup>               | 300 $\mu$ M | BicD2-CTD | 3 $\mu$ M   |
| Rab6 <sup>GTP<sub>min</sub></sup> | 300 $\mu$ M | BicD2-CTD | 3 $\mu$ M   |

**Table S2 Published posttranslational modifications in interacting domains of human Nup358, Rab6 and BicD2**

| Protein                                             | Nup358-RBD2                                                                                                     | BicD2-CTD  | Rab6                    |
|-----------------------------------------------------|-----------------------------------------------------------------------------------------------------------------|------------|-------------------------|
| <b>Residues included</b>                            | 2006 - 2443                                                                                                     | 715 – 804  | 13 – 174                |
| <b>Phosphorylated residues (Cdk1 sites in bold)</b> | 2008<br><b>2153</b><br><b>2246</b><br><b>2251</b><br>2270<br><b>2276</b><br><b>2280</b><br>2290<br>2293<br>2297 | None found | None found <sup>a</sup> |
| <b>Sumoylated residue</b>                           | 2022                                                                                                            |            |                         |

The Swiss-Prot database (1) was used to identify published posttranslational modification sites (2-6). Non-physiological modifications were excluded. Note that most of the listed phosphorylation sites are specific for G2 phase or mitosis; Cdk1-specific phosphorylation sites are highlighted in bold. It was shown that these Cdk1-specific phosphorylation sites increase binding of Nup358 to BicD2 in G2 phase (4). However, the cell cycle stage in which phosphorylation sites identified in refs (2,3) appeared is unknown, and whether these sites modulate the Nup358/BicD2 interaction remains to be investigated. <sup>a</sup>Rab6 is lipidated at its C-terminus (S-geranylgeranyl cysteine at residues 206 and 208 and a cysteine methyl ester at residue 208).

## SUPPLEMENTARY REFERENCES

1. UniProt-Consortium. (2017) UniProt: the universal protein knowledgebase. *Nucleic Acids Res* **45**, D158-D169
2. Huttlin, E. L., Jedrychowski, M. P., Elias, J. E., Goswami, T., Rad, R., Beausoleil, S. A., Villén, J., Haas, W., Sowa, M. E., and Gygi, S. P. (2010) A Tissue-Specific Atlas of Mouse Protein Phosphorylation and Expression. *Cell* **143**, 1174-1189
3. Villén, J., Beausoleil, S. A., Gerber, S. A., and Gygi, S. P. (2007) Large-scale phosphorylation analysis of mouse liver. *Proc Natl Acad of Sci U S A* **104**, 1488-1493
4. Baffet, A D., Hu, D J., and Vallee, R B. (2015) Cdk1 activates pre-mitotic nuclear envelope dynein recruitment and apical nuclear migration in neural stem cells. *Dev Cell* **33**, 703-716
5. Dephoure, N., Zhou, C., Villén, J., Beausoleil, S. A., Bakalarski, C. E., Elledge, S. J., and Gygi, S. P. (2008) A quantitative atlas of mitotic phosphorylation. *Proc Natl Acad of Sci U S A* **105**, 10762-10767
6. Hendriks, I. A., Lyon, D., Young, C., Jensen, L. J., Vertegaal, A. C. O., and Nielsen, M. L. (2017) Site-specific mapping of the human SUMO proteome reveals co-modification with phosphorylation. *Nat Struct Mol Biol* **24**, 325-336
